# Supplementary material for: A silica-supported palladium oxide catalyst (PdO@MCM-41) selectively cleaves ether linkages in lignin model compounds and alkali lignin via intramolecular hydrogen transfer
Source: Royal Society of Chemistry journal article supplement (doi:10.1039/d4ra08934k), 2025-01-01
Supplement: d4ra08934k2.pdf [file d4ra08934k2.pdf]

## Supporting Information

### A Silica-Supported Palladium Oxide Catalyst (PdO@MCM-41) Selectively Cleaves Ether Linkages in Lignin Model Compounds and Alkali Lignin via Intramolecular Hydrogen Transfer

The entire process of the product separation is shown in scheme S1. The product identification of bio-oil was then analyzed with GC–MS, GC-FID and FTIR. Lignin conversion (>80%) and bio-oil yield (76%) were obtained as following:

$$\text{Lignin conversion (wt\%)} = \frac{m(\text{Lignin}_{\text{applied}}) - m(\text{Lignin}_{\text{THF-washed filter cake}})}{m(\text{Lignin}_{\text{applied}})} \times 100 \quad (1)$$

$$\text{Bio oil yield (wt\%)} = \frac{m_{\text{bio oil}}}{m(\text{Lignin}_{\text{applied}})} \times 100 \quad (2)$$

$$\text{Monomer yield (wt\%)} = \frac{m(\text{monomers})}{m(\text{Lignin}_{\text{applied}})} \times 100 \quad (3)$$

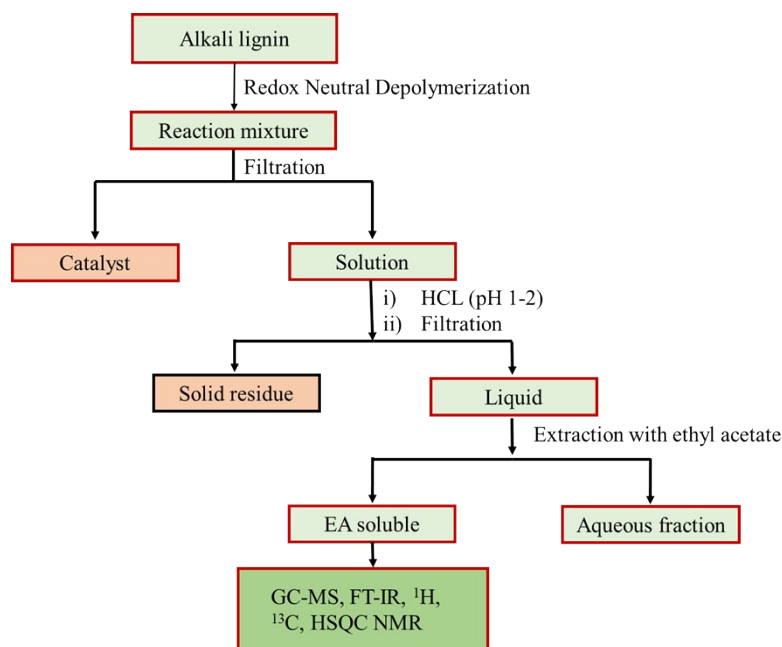

**Scheme S1.** Separation sequence for product isolation and lignin recovery

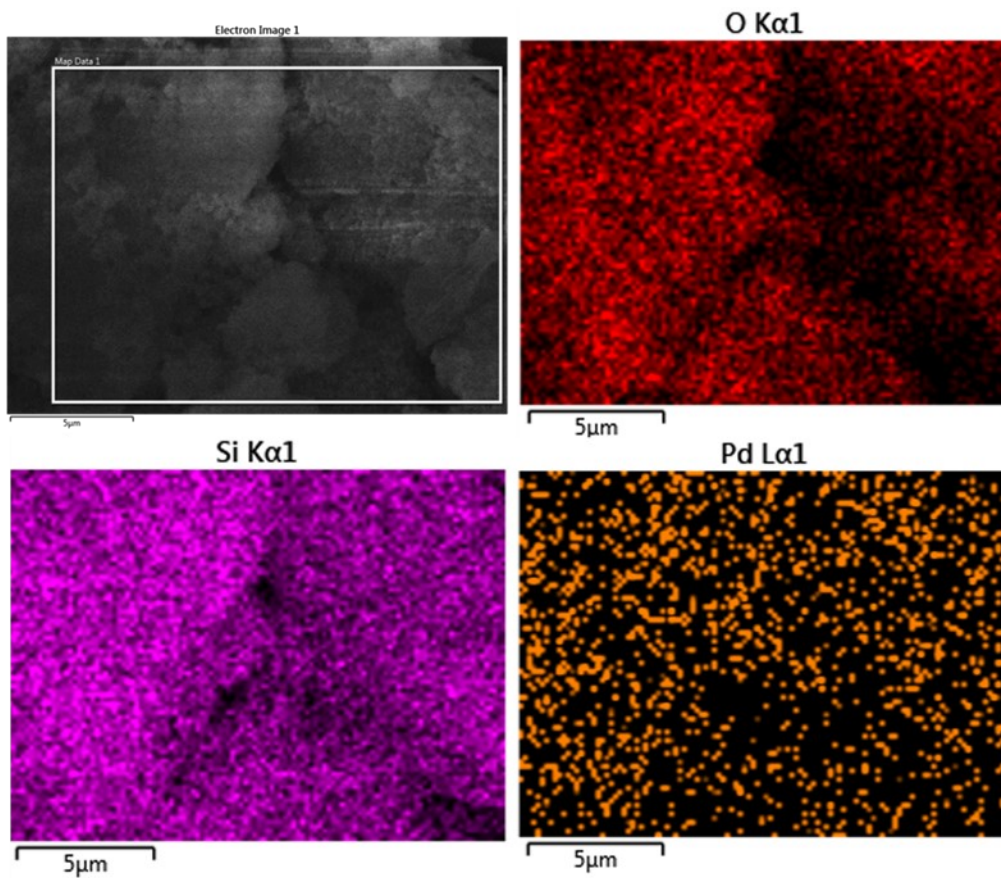

**Figure S1.** EDX elemental mapping of PdO@MCM-41

**Table S1.** ICP analysis of catalyst for redox neutral cleavage of 2-phenoxy-1-phenylethanol(PP-ol)

| <b>Solution Label</b> | <b>Pd (ppm)</b> | <b>Pd (mg/Kg)</b> | <b>Wt. %</b> |
|-----------------------|-----------------|-------------------|--------------|
| Fresh catalyst        | 176             | 176               | 1.7          |
| Used catalyst         | 146             | 146               | 1.4          |

**Table S2.** Surface area and pore size/volume distribution of MCM-41 and PdO@MCM-41

| <b>Sample</b> | <b>Surface area(m<sup>2</sup>/g)</b> | <b>Pore size(nm)</b> | <b>Pore volume(cm<sup>3</sup>/g)</b> |
|---------------|--------------------------------------|----------------------|--------------------------------------|
| MCM-41        | 255                                  | 2.3                  | 0.46                                 |
| PdO@MCM-41    | 184                                  | 2.6                  | 0.36                                 |

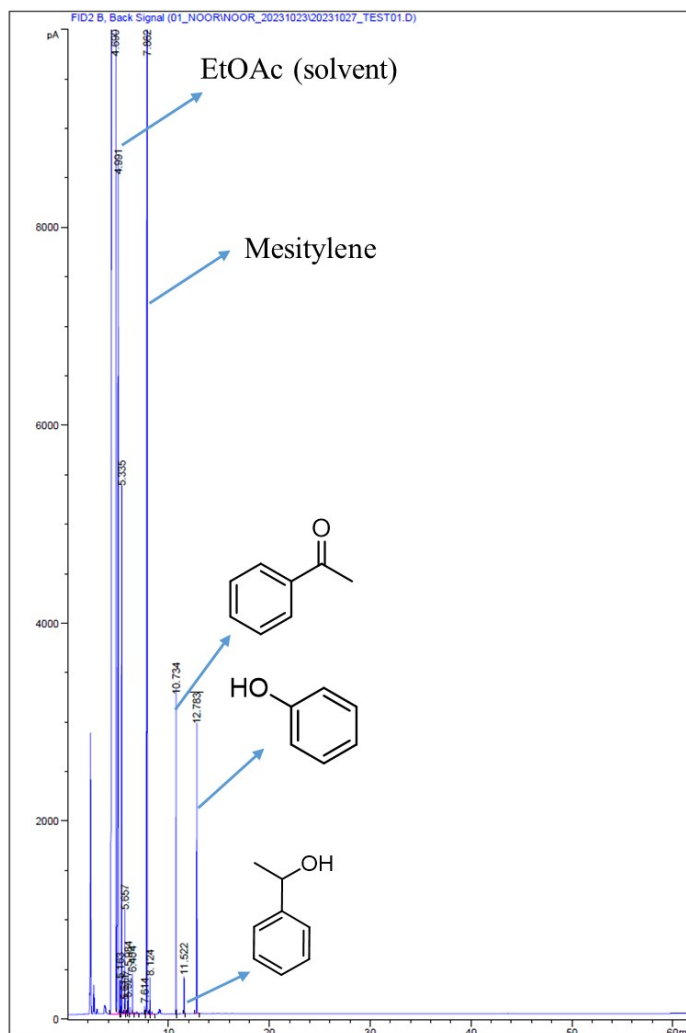

**Figure S2.** GC-FID chromatogram of redox neutral C-O bond cleavage in 2-phenoxy-1-phenyl ethanol using PdO@MCM-41 catalyst

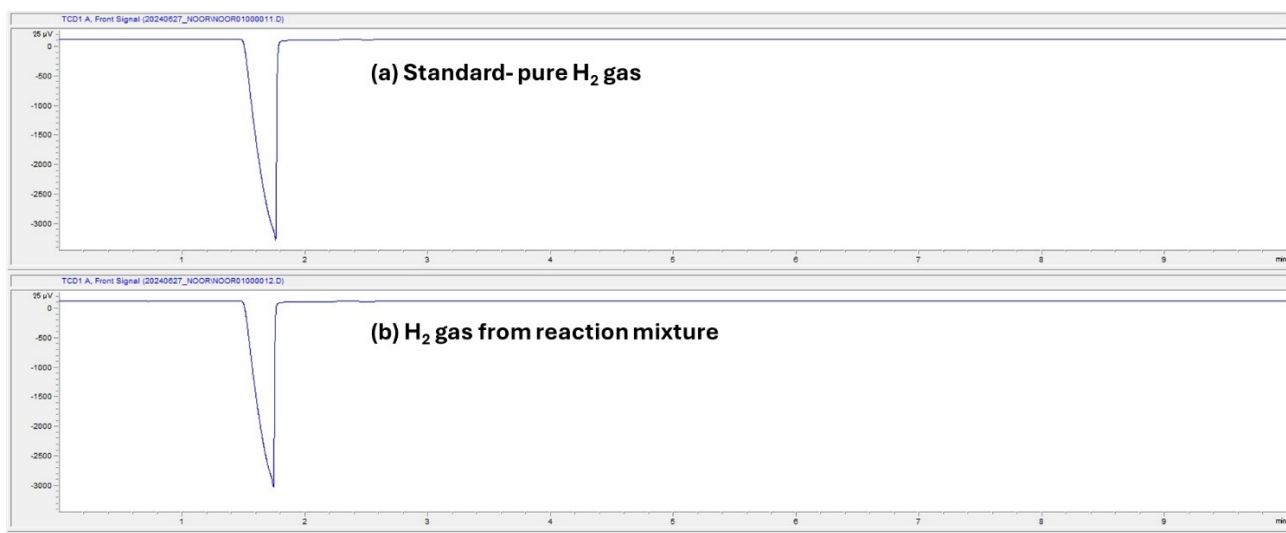

**Figure S3.** Detection of evolved hydrogen by PP-ol using GC-TCD a) chromatogram of pure  $H_2$  sample, b) chromatogram of  $H_2$  gas from reaction mixture. (The peak is inverted due to the use of helium as carrier gas whose thermal conductivity is close to that of hydrogen).

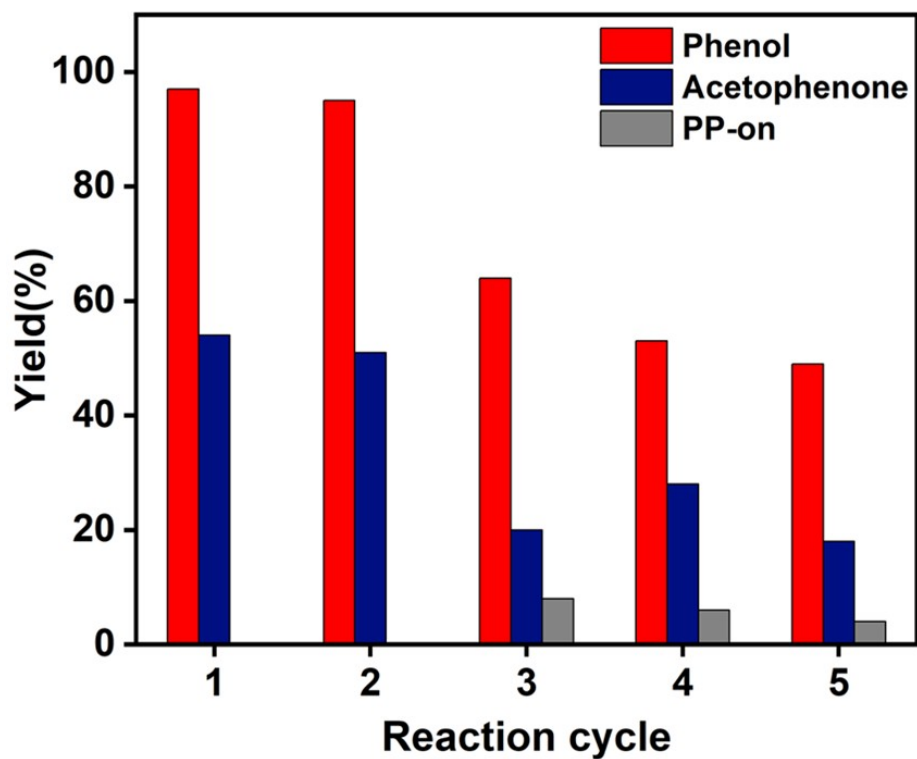

**Figure S4.** Recyclability of  $PdO@MCM-41$  for redox neutral cleavage of 2-phenoxy-1-phenylethanol under optimized reaction conditions.

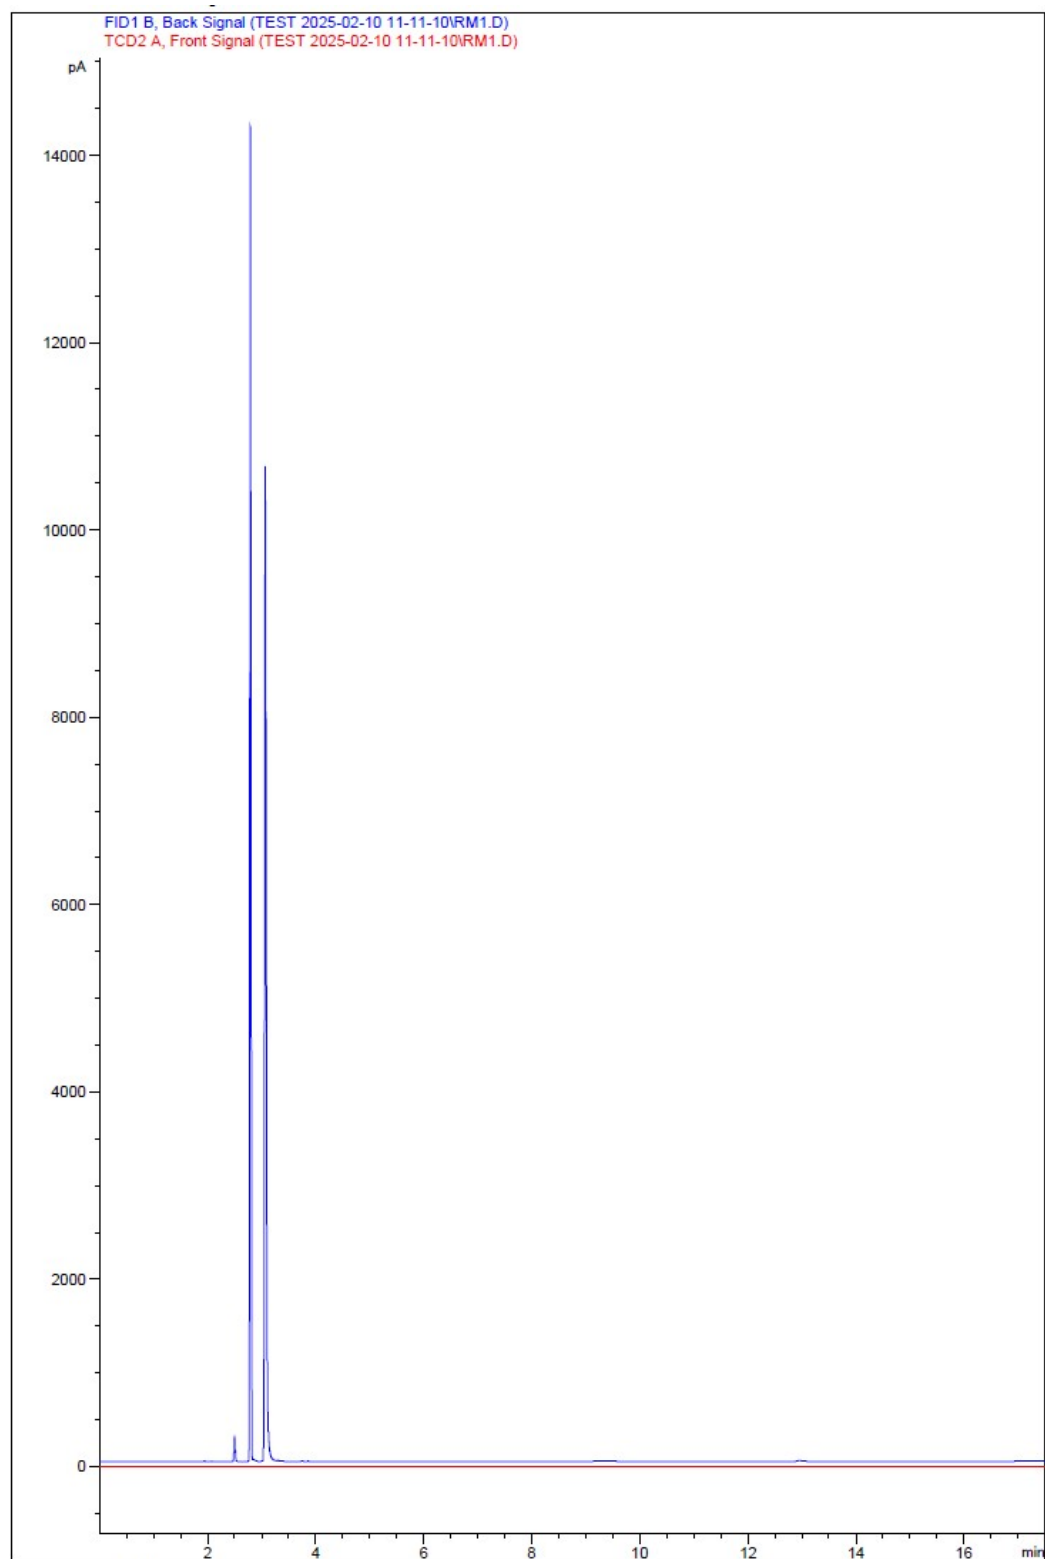

**Figure S5.** GC-FID chromatogram of redox neutral C-O bond cleavage in 2-phenoxy-1-phenyl ethanol using leached Pd

Print of window 38: Current Chromatogram(s)

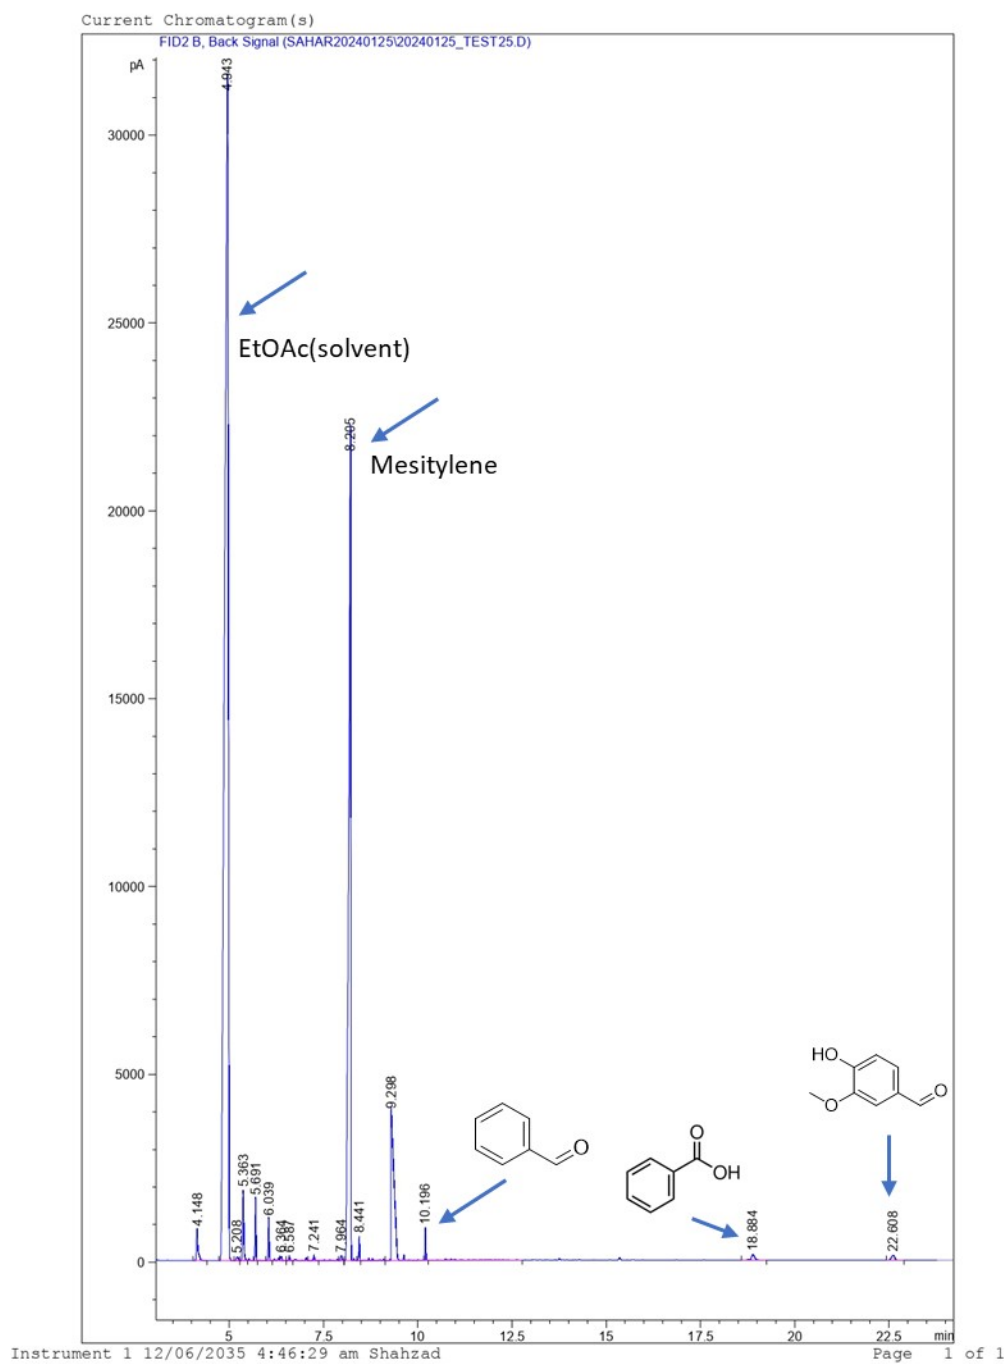

**Figure S6.** GC-FID chromatogram after depolymerization of alkali lignin.

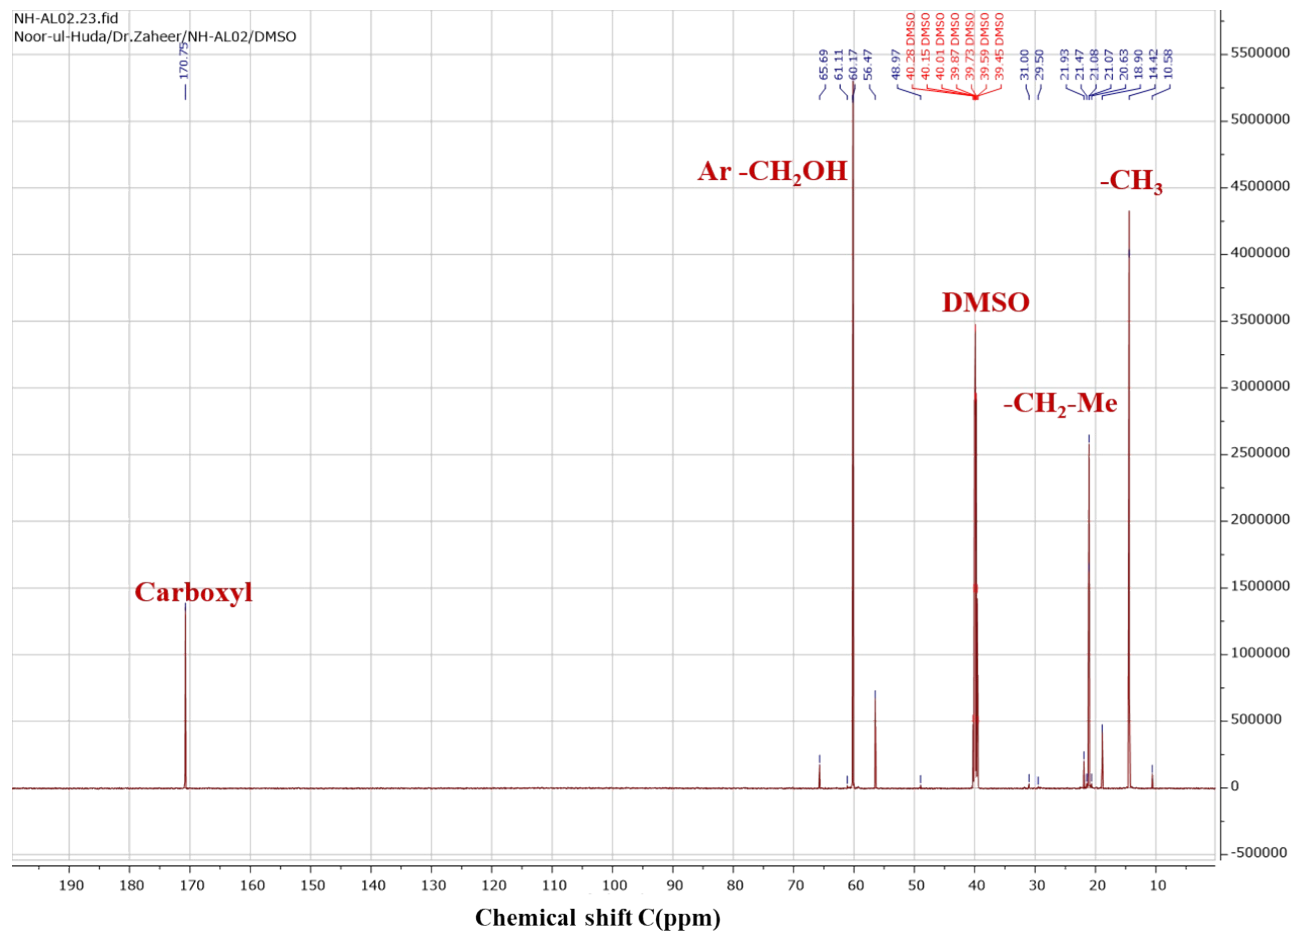

**Figure S7.** <sup>13</sup>C NMR of depolymerized alkali lignin.
